# Supplementary material for: OpenEP: A Cross-Platform Electroanatomic Mapping Data Format and Analysis Platform for Electrophysiology Research
Source: PubMed Central journal article supplement (PMC7952326; doi:10.3389/fphys.2021.646023), 2021-02-26
Supplement: Table_3.pdf [file Table_3.pdf]

# Supplementary Material

*Supplementary Table 3: OpenEP Electroanatomic Mapping Data Structure v1.0*

| Field name          | Description                                                                                                              | Size                              |
|---------------------|--------------------------------------------------------------------------------------------------------------------------|-----------------------------------|
| Userdata            |                                                                                                                          |                                   |
| .systemName         | Name of the clinical system that was used for collecting the clinical data                                               |                                   |
| .cartoFolder        | Absolute path to the original directory in which a Carto dataset was unzipped.                                           |                                   |
| .velocityFolder     | Absolute path to the original directory in which a Velocity dataset was unzipped.                                        |                                   |
| .precisionFolder    | Absolute path to the original directory in which a Precision dataset was unzipped.                                       |                                   |
| .rhythmiaFolder     | Absolute path to the original directory in which a Rhythmia dataset was unzipped.                                        |                                   |
| .electric           |                                                                                                                          |                                   |
| .tags               | The physician-visible names of the points applied during the clinical case.                                              | n points x 1                      |
| .names              | The internal names of the points used by the clinical electroanatomic mapping system                                     | n points x 1                      |
| .electrodeNames_bip | The names of the electrode pair recording the bipole electrogram at each point                                           | n points x 1                      |
| .egmX               | The Cartesian co-ordinates of the mapping point                                                                          | n points x 3                      |
| .egm                | The recorded bipolar electrograms                                                                                        | n points x<br>egm<br>duration     |
| .electrodeNames_uni | The names of the two unipole electrodes which make up the bipolar electrode pair at each mapping point.                  | n points x 2                      |
| .egmUniX            | The Cartesian co-ordinates of the two unipole electrodes which make up the bipolar electrode pair at each mapping point. | n points x 3<br>x 2               |
| .egmUni             | The recorded unipolar electrograms                                                                                       | n points x<br>egm<br>duration x 2 |
| .egmRef             | The reference electrograms for each point                                                                                | n points x<br>egm<br>duration     |
| .ecg                | The surface electrocardiogram for each point                                                                             | n points x<br>egm<br>duration     |
| .sampleFrequency    | The sampling frequency of electrograms in the dataset                                                                    | Integer (Hz)                      |
| .annotations        |                                                                                                                          |                                   |
| .woi                | The window of interest for each point relative to the reference annotation                                               | n points x 2                      |
| .referenceAnnot     | The reference annotation for each point with one value each for the start and end of the window                          | n points x 1                      |

|                    |                                                                                                                                                              |                              |
|--------------------|--------------------------------------------------------------------------------------------------------------------------------------------------------------|------------------------------|
| .mapAnnot          | The local activation time annotation for each point relative to the reference annotation                                                                     | n points x 1                 |
| .signalProps{1..m} | Sub-field to contain data relating to each of <i>m</i> clinical system-defined signal properties                                                             | m signal properties          |
| .name              | Name of the clinical-system derived signal property metric (for example CFAEMean)                                                                            | n points x 1                 |
| .value             | Value of the signal property for each of n points                                                                                                            | n points x 1                 |
| .propSettings      | String containing the user-defined settings used to create the clinical system-derived signal properties, for example "peak amplitude,X; temporal_spacing,Y" | Variable length string       |
| .voltages          |                                                                                                                                                              |                              |
| .bipolar           | The bipolar voltage measured by the clinical mapping system for each point                                                                                   | n points x 1                 |
| .unipolar          | The unipolar voltage measured by the clinical mapping system for each point                                                                                  | n points x 1                 |
| .impedances        |                                                                                                                                                              |                              |
| .time              | Cell array of time values for impedance traces for each point                                                                                                | 1 x n points                 |
| .time{n}           | Time values for impedance traces for point n                                                                                                                 | Impedance trace duration x 1 |
| .value             | Cell array of impedance values for for each point                                                                                                            | 1 x n points                 |
| .value{n}          | Impedance values for point n                                                                                                                                 | Impedance trace duration x 1 |
| .egmSurfX          | The Cartesian co-ordinates of the mapping point, projected to the closest point on the surface of the chamber                                                | n points x 3                 |
| .barDirection      | Surface normal for each mapping point                                                                                                                        | n points x 3                 |
| .notes             | Cell array of notes relevant to the dataset                                                                                                                  | >=1 x n notes                |
| .surface           |                                                                                                                                                              |                              |
| .triRep            | A Trirep object                                                                                                                                              |                              |
| .X                 | The Cartesian co-ordinates of the vertices in the surface mesh                                                                                               | n vertices x 3               |
| .Triangulation     | The vertex indices of each face in the surface mesh                                                                                                          | n faces x 3                  |
| .isVertexAtRim     | Logical array with true values indicating vertices that are on a free boundary                                                                               | n vertices x 1               |
| .act_bip           | Local activation time data (column 1) and bipolar voltage data (column 2) from the clinical map                                                              | n vertices x 2               |
| .uni_imp_frc       | Unipolar voltage data (column 1), impedance data (column 2) and force data (column 3) from the clinical map                                                  | n vertices x 3               |
| .signalMaps{1..n}  | Sub-field to contain data relating to each of <i>m</i> clinical system-defined signal property maps                                                          | m signal property maps       |

|          |               |                                                                                                                                                              |                        |
|----------|---------------|--------------------------------------------------------------------------------------------------------------------------------------------------------------|------------------------|
|          | .name         | Name of the clinical-system derived signal property map (for example CFAEMean)                                                                               | Single string value    |
|          | .map          | Value of the signal properties at every point                                                                                                                | n points x 1           |
|          | .propSettings | String containing the user-defined settings used to create the clinical system-derived signal properties, for example "peak amplitude,X; temporal_spacing,Y" | Variable length string |
| .rf      |               | Structure field to store manually acquired ablation site data                                                                                                |                        |
|          | .originaldata |                                                                                                                                                              |                        |
|          | .force        | Force data                                                                                                                                                   |                        |
|          | .time         | Ablation time data                                                                                                                                           | n time intervals x 1   |
|          | .force        | Contact force data                                                                                                                                           | n time intervals x 1   |
|          | .axialangle   | Axial angle                                                                                                                                                  | n time intervals x 1   |
|          | .lateralangle | Lateral angle                                                                                                                                                | n time intervals x 2   |
|          | .position     | Cartesian co-ordinates                                                                                                                                       | n time intervals x 3   |
|          | .ablparams    | Ablation data                                                                                                                                                |                        |
|          | .time         | Ablation time data                                                                                                                                           | n time intervals x 1   |
|          | .power        | Power                                                                                                                                                        | n time intervals x 1   |
|          | .impedance    | Impedance                                                                                                                                                    | n time intervals x 1   |
|          | .distaltemp   | Temperature                                                                                                                                                  | n time intervals x 1   |
| .rfindex |               | Structure field to store automatically acquired ablation site data                                                                                           |                        |
|          | .name         |                                                                                                                                                              |                        |
|          | .tag          | Structure field to store ablation tag data from the Carto3 Visitag module                                                                                    |                        |
|          | .X            | Cartesian co-ordinates of each tag                                                                                                                           | n tag x 3              |
|          | .time         | Time stamp of each tag                                                                                                                                       | n tag x 1              |
|          | .avgForce     | Average force applied at each tag                                                                                                                            | n tag x 1              |
|          | .maxTemp      | Maximum recorded catheter tip temperature at each tag                                                                                                        | n tag x 1              |
|          | .maxPower     | Maximum applied radiofrequency power at each tag                                                                                                             | n tag x 1              |
|          | .Impedance    |                                                                                                                                                              |                        |
|          | .baseImp      | Baseline impedance, in Ohms, recorded at each tag                                                                                                            | n tag x 1              |
|          | .impDrop      | Impedance drop, in Ohms, recorded at each tag                                                                                                                | n tag x 1              |
|          | .fti          | Force time integral calculated at each tag                                                                                                                   | n tag x 1              |
|          | .index        |                                                                                                                                                              |                        |
|          | .name         | Proprietary name of the calculated radiofrequency index                                                                                                      | String                 |
|          | .value        | Value of the proprietary radiofrequency index                                                                                                                | n tag x 1              |
|          | .grid         | Structure field to store grid data from the Carto3 Visitag module                                                                                            | n tag x 1 cell array   |

|                |                                                                                |                                                        |
|----------------|--------------------------------------------------------------------------------|--------------------------------------------------------|
|                |                                                                                | containing m<br>grid point x<br>1 array<br>1 x 3 array |
| .X             | Cartesian co-ordinates of this grid<br>point in the ablation dataset [X, Y, Z] |                                                        |
| .time          | Timeseries for this grid point                                                 | n time<br>intervals x 1                                |
| .index         |                                                                                |                                                        |
| .name          | Proprietary name of the calculated<br>radiofrequency index                     | String                                                 |
| .value         | Timeseries of the proprietary<br>radiofrequency index                          | n time<br>intervals x 1                                |
| .impedance     | Impedance timeseries for this grid<br>point, Ohms                              | n time<br>intervals x 1                                |
| .temperature   | Temperature timeseries for this grid<br>point, C                               | n time<br>intervals x 1                                |
| .power         | Power timeseries for this grid point,<br>W                                     | n time<br>intervals x 1                                |
| .impedanceDrop | Impedance drop timeseries for this<br>grid point, Ohms                         | n time<br>intervals x 1                                |
| .force         | Force timeseries for this grid point, g                                        | n time<br>intervals x 1                                |
